# Supplementary material
Source: Research Square preprint supplement (doi:10.21203/rs.3.rs-8833749/v1)
Supplement: Supplementary file 1 [file b604350d45e6c3f6953af5b9.docx]

**INTERVIEW GUIDE**

The following document presents the semi-structured interview guides employed in the MOVESCHOOL study. It includes the individual interview scripts for school leaders and teachers, as well as the focus group guide used with students. All instruments were originally developed and administered in Spanish to ensure native language comprehension and were subsequently translated into English for the purpose of this publication.

**1. Interview guide for school leaders**

*Hello [Name], we are about to begin the interview, the objective of which is to evaluate our MOVESCHOOL programme. In order to accurately capture your opinions, we would like to record the session. Do you agree?*

*In this interview, we ask for your complete honesty regarding both positive and negative aspects, as we wish to understand your genuine opinion in order to improve in the future.*

*As you know, the MOVESCHOOL programme has been implemented throughout the school year. This intervention is based on Physically Active Learning (e.g., teaching Mathematics or Language through movement), Active Breaks (incorporating active pauses via an online platform), and Active Recess.*

**General questions**

- In general, what is your opinion of our programme?

**Benefits**

- What do you consider the usefulness of developing this type of programme?
- What impact do you think the programme has had on students' health?

**Organisational culture**

- Do you feel more capable of facilitating physical activity practice during the school day after participating in the MOVESCHOOL programme? Why?
- Do you feel more motivated to facilitate your students' physical activity practice after participating in the MOVESCHOOL programme? Why?
- Do you consider that, due to your participation in the MOVESCHOOL programme, your school has promoted physical activity practice more than before participating in this programme? Why?
  - During the MOVESCHOOL programme, do you perceive that you have supported your teaching staff more in facilitating physical activity during the school day than before? Please explain your answer.
  - Do you believe the MOVESCHOOL programme has led to changes in your school's policies and vision regarding the promotion of physical activity?
  - Has there been any resistance from the teaching staff towards any of the programme components?
- Has the MOVESCHOOL programme increased teachers' competence in implementing physically active lessons?
- Has the MOVESCHOOL programme increased teachers' competence in including active breaks in their classes?
- During MOVESCHOOL, has the school increased the provision of activities, spaces, material, and human resources to facilitate physical activity during recess?

**Limitations and strengths**

- What advantages do you think this type of programme might have? You can organise your answer according to each intervention component.
- What drawbacks or barriers do you find?
- Is there any aspect that could be improved regarding the programme implementation? How do you think we could improve it?
- At an organisational level (contact with teachers, schedules, content, materials, etc.), what do you think worked best in the programme? And what worked worst?

**Implementation**

- Would you encourage leadership teams from other schools to carry out this type of action? What reasons would you use to convince them to do so, or what reasons would you use to discourage them?
- Do you plan to continue supporting/promoting any of the programme’s actions in the upcoming school years? Why? What would need to change to make this easier?

**Open ending**

- Finally, is there any aspect you think is important to comment on that we have not asked about?

**2. Interview guide for teachers**

*Hello [Name], we are about to begin the interview, the objective of which is to evaluate our MOVESCHOOL programme. In order to accurately capture your opinions, we would like to record the session. Do you agree?*

*In this interview, we ask for your complete honesty regarding both positive and negative aspects, as we wish to understand your genuine opinion in order to improve in the future.*

*As you know, the MOVESCHOOL programme has been implemented throughout the school year. This intervention is based on Physically Active Learning (e.g., teaching Mathematics or Language through movement), Active Breaks (incorporating active pauses via an online platform), and Active Recess.*

**General questions**

- In general, what is your opinion of our programme?
- How did you feel during the implementation of the interventions?

**Benefits**

- What do you consider the usefulness of developing this type of programme?
- What impact do you think the programme has had on students' health?

**Organisational culture**

- Do you feel more capable of facilitating physical activity practice during the school day after your participation in the MOVESCHOOL programme? Why?
- Do you feel more motivated to facilitate your students' physical activity practice after your participation in the MOVESCHOOL programme? Why?
- Do you consider that, with the implementation of the MOVESCHOOL programme, your school promotes physical activity practice more than before this programme? Why?
  - During the MOVESCHOOL programme, have you perceived more support from school leaders, colleagues, or other members of the educational community to facilitate physical activity during the school day than before? Please explain your answer.
  - Do you believe the MOVESCHOOL programme has led to changes in your school's policies and vision regarding the promotion of physical activity?
  - Has there been any resistance from students, school leaders, or colleagues towards the implementation of any of the programme components?
- Has the MOVESCHOOL programme increased your competence in implementing physically active lessons?
- Has the MOVESCHOOL programme increased your competence in including active breaks in your classes?
- During MOVESCHOOL, has the school increased the provision of activities, spaces, material, and human resources to facilitate physical activity during recess?

**Learning and behaviour**

- How do you think the programme development has affected your students' learning?
- Do you think the programme development might have caused a decrease in the pace of curricular work?

**Limitations and strengths**

- What advantages do you think this type of programme might have? You can organise your answer according to each intervention component.
- What drawbacks or barriers do you find?
- Is there any aspect that could be improved regarding the programme implementation? How do you think we could improve it?
- At an organisational level (contact with the technician, schedules, content, materials, etc.), what do you think worked best in the programme? And what worked worst?

**Student participation and motivation**

- How do you think your students' involvement has been in the three components?
- Do you think the programme has affected your students' motivation towards their studies?
- Do you think the programme might have influenced social interaction and collaboration among your students?
- Do you think this can positively or negatively affect the classroom climate?
- Do you think your students want the programme to be maintained for the next school year?

**Implementation**

- Would you encourage other teachers to carry out this type of action? What reasons would you use to convince them, or what reasons would you use to discourage them?
- Do you plan to continue implementing any of the actions in the upcoming school years? Why? What would need to change to facilitate this?

**Open ending**

- Finally, is there any aspect you think is important to comment on that we have not asked about?

**3. Focus group guide for students**

*Hello everyone, we are about to begin this interview, the objective of which is to evaluate our MOVESCHOOL programme. In order to accurately capture your opinions, we would like to record the interview. Do you agree?*

*In this interview, we ask for your honesty regarding both positive and negative aspects, as we wish to understand your genuine opinion in order to improve in the future.*

*As you know, the MOVESCHOOL programme has been implemented throughout the school year. This intervention is based on Physically Active Learning (e.g., teaching Mathematics or Language through movement), Active Breaks (incorporating active pauses via an online platform), and Active Recess.*

**General questions**

- In general, what did you think of the MOVESCHOOL programme?
- How did you feel during the implementation of the MOVESCHOOL programme?

**Limitations and strengths**

- What did you like most about the MOVESCHOOL programme? And what did you like least?
- How could we change or improve what you liked least?

**Organisational culture**

- During the programme, did you feel more capable/prepared to engage in physical activity at school? Why?
- Did the MOVESCHOOL programme motivate you to engage in more physical activity during the school day? Why?
- During the programme, did the school offer you greater opportunities to be more active? How?
- During the MOVESCHOOL programme, have you perceived more support from teachers for you to engage in physical activity during the school day than before the programme? Please explain your answer.

**Benefits**

- Do you think the MOVESCHOOL programme has provided you with any benefits? What benefits?

**Learning**

- Do you think the MOVESCHOOL programme has influenced your learning compared to the previous school year when the programme was not in place? In what way? For better? For worse? Did it not have any effect?
- Have you learned anything new with the MOVESCHOOL programme that you would not have learned without the programme?

**Participation and motivation**

- Being honest, what level of involvement and participation did you have during the MOVESCHOOL programme?
- Were you motivated to be part of the MOVESCHOOL programme, or conversely, did you prefer to continue as you were in previous years?
- Do you think the MOVESCHOOL programme has helped you build relationships with other classmates and students in the school with whom you did not have much of a relationship before?

**Physical involvement**

- Do you think you have improved physically or do you feel the same after having participated in the MOVESCHOOL programme? What do you think this is due to?
- How much physical effort do you think the MOVESCHOOL programme required of you?

**Activities**

- What did you think of the activities proposed in the MOVESCHOOL programme?
- How difficult did you think the activities were (easy, difficult, the same as in class/recess, etc.)?

**Future implementation**

- Would you like to continue with the MOVESCHOOL programme? Why?

**Open ending**

- Finally, is there any aspect you think is important to comment on that we have not asked about?
